# Supplementary material for: Mathematical Models of Plasmid Population Dynamics
Source: PubMed Central journal article supplement (PMC8600371; doi:10.3389/fmicb.2021.606396), 2021-11-04
Supplement: Table_1.pdf [file Table_1.pdf]

|                                   | Data | ODE | IBM | PDE | Other | Stochastic | Deterministic | Spatial | Topic                |
|-----------------------------------|------|-----|-----|-----|-------|------------|---------------|---------|----------------------|
| Novick and Hoppensteadt 1978      |      |     |     |     |       |            |               |         | Plasmid replication  |
| Lee and Bailey, 1984              |      |     |     |     |       |            |               |         | Plasmid replication  |
| Nordström et al. 1984             |      |     |     |     |       |            |               |         | Plasmid replication  |
| Seo and Bailey 1985               |      |     |     |     |       |            |               |         | Plasmid replication  |
| Bremer and Lin-Chao 1986          |      |     |     |     |       |            |               |         | Plasmid replication  |
| Greenhalf et al. 1989             |      |     |     |     |       |            |               |         | Plasmid replication  |
| Keasling and Palsson 1989         |      |     |     |     |       |            |               |         | Plasmid replication  |
| Müller et al. 1991                |      |     |     |     |       |            |               |         | Plasmid replication  |
| Brendel and Perelson 1993         |      |     |     |     |       |            |               |         | Plasmid replication  |
| Leipold et al. 1994               |      |     |     |     |       |            |               |         | Plasmid replication  |
| Kuo and Keasling 1996             |      |     |     |     |       |            |               |         | Plasmid replication  |
| Goss and Peccoud 1998             |      |     |     |     |       |            |               |         | Plasmid replication  |
| Paulsson and Ehrenberg 1998       |      |     |     |     |       |            |               |         | Plasmid replication  |
| Paulsson and Ehrenberg 2001       |      |     |     |     |       |            |               |         | Plasmid replication  |
| Watve et al. 2010                 |      |     |     |     |       |            |               |         | Plasmid replication  |
| Field and Summers 2011            |      |     |     |     |       |            |               |         | Plasmid replication  |
| Ishii et al. 1978                 |      |     |     |     |       |            |               |         | Plasmid segregation  |
| Nordström et al. 1980             |      |     |     |     |       |            |               |         | Plasmid segregation  |
| Nordstrom and Austin 1989         |      |     |     |     |       |            |               |         | Plasmid segregation  |
| Hsu and Chang 2019                |      |     |     |     |       |            |               |         | Plasmid segregation  |
| Münch et al. 2019                 |      |     |     |     |       |            |               |         | Plasmid segregation  |
| Stewart and Levin 1977            |      |     |     |     |       |            |               |         | Plasmid stability    |
| Levin et al. 1979                 |      |     |     |     |       |            |               |         | Plasmid stability    |
| Levin and Stewart 1980            |      |     |     |     |       |            |               |         | Plasmid stability    |
| Nordström and Aagaard-Hansen 1984 |      |     |     |     |       |            |               |         | Plasmid stability    |
| Ataai and Shulert 1987            |      |     |     |     |       |            |               |         | Plasmid stability    |
| Cooper et al. 1987                |      |     |     |     |       |            |               |         | Plasmid stability    |
| Lenski and Bouma 1987             |      |     |     |     |       |            |               |         | Plasmid stability    |
| Stephanopoulos and Lapudis 1988   |      |     |     |     |       |            |               |         | Plasmid stability    |
| Summers 1991                      |      |     |     |     |       |            |               |         | Plasmid stability    |
| Mongold 1992                      |      |     |     |     |       |            |               |         | Plasmid stability    |
| Macken et al. 1994                |      |     |     |     |       |            |               |         | Plasmid stability    |
| Bergstrom et al. 2000             |      |     |     |     |       |            |               |         | Plasmid stability    |
| Ganusov and Brilkov 2002          |      |     |     |     |       |            |               |         | Plasmid stability    |
| Hsu and Tzeng 2002                |      |     |     |     |       |            |               |         | Plasmid stability    |
| Dionisio 2005                     |      |     |     |     |       |            |               |         | Plasmid stability    |
| Imran et al. 2005                 |      |     |     |     |       |            |               |         | Plasmid stability    |
| Novozhilov et al. 2005            |      |     |     |     |       |            |               |         | Plasmid stability    |
| Mochizuki et al. 2006             |      |     |     |     |       |            |               |         | Plasmid stability    |
| Song et al. 2006                  |      |     |     |     |       |            |               |         | Plasmid stability    |
| De Gelder et al. 2007             |      |     |     |     |       |            |               |         | Plasmid stability    |
| Lili et al. 2007                  |      |     |     |     |       |            |               |         | Plasmid stability    |
| Ponciano et al. 2007              |      |     |     |     |       |            |               |         | Plasmid stability    |
| De Gelder et al. 2008             |      |     |     |     |       |            |               |         | Plasmid stability    |
| Svara and Rankin 2011             |      |     |     |     |       |            |               |         | Plasmid stability    |
| Yuan et al. 2011                  |      |     |     |     |       |            |               |         | Plasmid stability    |
| Kentzoglakis et al. 2013          |      |     |     |     |       |            |               |         | Plasmid stability    |
| Tazzyman and Bonhoeffer 2013      |      |     |     |     |       |            |               |         | Plasmid stability    |
| Yurtsev et al. 2013               |      |     |     |     |       |            |               |         | Plasmid stability    |
| San Millan et al. 2014            |      |     |     |     |       |            |               |         | Plasmid stability    |
| Harrison et al. 2015              |      |     |     |     |       |            |               |         | Plasmid stability    |
| Peña-Miller et al. 2015           |      |     |     |     |       |            |               |         | Plasmid stability    |
| Harrison et al. 2016              |      |     |     |     |       |            |               |         | Plasmid stability    |
| Werbow et al. 2017                |      |     |     |     |       |            |               |         | Plasmid stability    |
| Hall et al. 2017                  |      |     |     |     |       |            |               |         | Plasmid stability    |
| Lopatkin et al. 2017              |      |     |     |     |       |            |               |         | Plasmid stability    |
| Werisch et al. 2017               |      |     |     |     |       |            |               |         | Plasmid stability    |
| Grover and Wang 2019              |      |     |     |     |       |            |               |         | Plasmid stability    |
| Zwanzig et al. 2019               |      |     |     |     |       |            |               |         | Plasmid stability    |
| Gama et al. 2020                  |      |     |     |     |       |            |               |         | Plasmid stability    |
| Jordt et al. 2020                 |      |     |     |     |       |            |               |         | Plasmid stability    |
| Wang and You, 2020                |      |     |     |     |       |            |               |         | Plasmid stability    |
| Alonso-del Valle et al. 2021      |      |     |     |     |       |            |               |         | Plasmid stability    |
| Freter et al. 1983                |      |     |     |     |       |            |               |         | Plasmid transmission |
| Lundquist and Levin 1986          |      |     |     |     |       |            |               |         | Plasmid transmission |
| Clewlow et al. 1990               |      |     |     |     |       |            |               |         | Plasmid transmission |
| Simonsen et al. 1990              |      |     |     |     |       |            |               |         | Plasmid transmission |
| Simonsen 1991                     |      |     |     |     |       |            |               |         | Plasmid transmission |
| Macdonald et al. 1992             |      |     |     |     |       |            |               |         | Plasmid transmission |
| Smets et al. 1993                 |      |     |     |     |       |            |               |         | Plasmid transmission |
| Beaudoin et al. 1998              |      |     |     |     |       |            |               |         | Plasmid transmission |
| Licht et al. 1999                 |      |     |     |     |       |            |               |         | Plasmid transmission |
| Landis et al. 2000                |      |     |     |     |       |            |               |         | Plasmid transmission |
| Smith 2001                        |      |     |     |     |       |            |               |         | Plasmid transmission |
| Lagido et al. 2003                |      |     |     |     |       |            |               |         | Plasmid transmission |
| Gregory et al. 2006               |      |     |     |     |       |            |               |         | Plasmid transmission |
| Krone et al. 2007                 |      |     |     |     |       |            |               |         | Plasmid transmission |
| Massoudieh et al. 2007            |      |     |     |     |       |            |               |         | Plasmid transmission |
| Gregory et al. 2008               |      |     |     |     |       |            |               |         | Plasmid transmission |
| Nogueira et al. 2009              |      |     |     |     |       |            |               |         | Plasmid transmission |
| Philipsen et al. 2010             |      |     |     |     |       |            |               |         | Plasmid transmission |
| Zhong et al. 2010                 |      |     |     |     |       |            |               |         | Plasmid transmission |
| Mc Ginty et al. 2011              |      |     |     |     |       |            |               |         | Plasmid transmission |
| Merkey et al. 2011                |      |     |     |     |       |            |               |         | Plasmid transmission |
| Rankin et al. 2011                |      |     |     |     |       |            |               |         | Plasmid transmission |
| Volkova et al. 2012               |      |     |     |     |       |            |               |         | Plasmid transmission |
| Levin et al. 2014                 |      |     |     |     |       |            |               |         | Plasmid transmission |
| Ahmad et al. 2015                 |      |     |     |     |       |            |               |         | Plasmid transmission |
| Baker et al. 2016                 |      |     |     |     |       |            |               |         | Plasmid transmission |
| Lopatkin et al. 2016              |      |     |     |     |       |            |               |         | Plasmid transmission |
| Cazer et al. 2018                 |      |     |     |     |       |            |               |         | Plasmid transmission |
| Campos et al. 2019                |      |     |     |     |       |            |               |         | Plasmid transmission |
| Klümper et al. 2019               |      |     |     |     |       |            |               |         | Plasmid transmission |
| Tepekule et al. 2019              |      |     |     |     |       |            |               |         | Plasmid transmission |
| Ledda et al. 2020                 |      |     |     |     |       |            |               |         | Plasmid transmission |
| Leon-Sampedro et al. 2020         |      |     |     |     |       |            |               |         | Plasmid transmission |
| van Dijk et al. 2020              |      |     |     |     |       |            |               |         | Plasmid transmission |
| Lopez et al. 2021                 |      |     |     |     |       |            |               |         | Plasmid transmission |
| Condit and Levin 1990             |      |     |     |     |       |            |               |         | Plasmid evolution    |
| De Gelder et al. 2004             |      |     |     |     |       |            |               |         | Plasmid evolution    |
| Joyce et al. 2005                 |      |     |     |     |       |            |               |         | Plasmid evolution    |
| Mc Ginty and Rankin 2012          |      |     |     |     |       |            |               |         | Plasmid evolution    |
| Mc Ginty et al. 2013              |      |     |     |     |       |            |               |         | Plasmid evolution    |
| Ledda and Ferretti 2014           |      |     |     |     |       |            |               |         | Plasmid evolution    |
| Tazzyman and Bonhoeffer 2014      |      |     |     |     |       |            |               |         | Plasmid evolution    |
| Tazzyman and Bonhoeffer 2015      |      |     |     |     |       |            |               |         | Plasmid evolution    |
| Loftie-Eaton et al. 2016          |      |     |     |     |       |            |               |         | Plasmid evolution    |
| Rodríguez-Beltran et al. 2018     |      |     |     |     |       |            |               |         | Plasmid evolution    |
| Ilhan et al. 2019                 |      |     |     |     |       |            |               |         | Plasmid evolution    |
| Mei et al. 2019                   |      |     |     |     |       |            |               |         | Plasmid evolution    |
| Rodríguez-Beltran et al. 2019     |      |     |     |     |       |            |               |         | Plasmid evolution    |
| Santer and Uecker 2019            |      |     |     |     |       |            |               |         | Plasmid evolution    |
| Lehtinen et al. 2021              |      |     |     |     |       |            |               |         | Plasmid evolution    |
